# Supplementary material for: Hazard Potential of Compound Flooding from Rainfall, Storm Surge, and Groundwater in Coastal New York and Connecticut
Source: Copernicus journal article supplement (doi:10.5194/egusphere-2025-5683), 2025-11-25
Supplement: Supplementary file 1 [file Glas etal Supplementary Tables.xlsx]

## Sheet: S1_rainfall imp stats
site_no	proportion_complete	RMSE	MAE	NRMSE	NSE	n_refs	mod_notes	regression_model
USW00094789	1	NA	NA	NA	NA	NA	Complete input record: no imputation attempted	NA
USW00094728	1	NA	NA	NA	NA	NA	Complete input record: no imputation attempted	NA
USW00094702	1	NA	NA	NA	NA	NA	Complete input record: no imputation attempted	NA
USW00014732	1	NA	NA	NA	NA	NA	Complete input record: no imputation attempted	NA
USW00004781	0.999684	3.58482	1.09509	0.383049	0.853265	19	Model accepted: missing values imputed	ridge
USW00094745	0.991892	5.24185	1.91437	0.533708	0.715141	16	Model accepted: missing values imputed	ridge
USC00307134	0.979887	4.2722	1.60884	0.462637	0.785956	16	Model accepted: missing values imputed	ridge
USC00300889	0.957089	2.35223	0.851516	0.244044	0.940439	13	Model accepted: missing values imputed	ridge
USC00063207	0.892434	2.38462	0.891591	0.262641	0.931016	18	Model accepted: missing values imputed	ridge
USC00067970	0.831148	4.55586	1.81912	0.464601	0.784133	20	Model accepted: missing values imputed	ridge
USC00066655	0.76107	7.61505	3.33786	0.739622	0.452922	1	Model accepted: missing values imputed	SLR
USW00014758	0.53088	3.37037	1.17529	0.390243	0.847696	18	Model accepted: missing values imputed	ridge
USW00014719	0.443584	3.37546	1.11121	0.400987	0.83919	15	Model accepted: missing values imputed	ridge
USW00054780	0.434686	4.27836	1.42915	0.482187	0.767467	13	Model accepted: missing values imputed	ridge
USW00014794	0.429053	3.20779	1.03138	0.374428	0.859786	12	Model accepted: missing values imputed	ridge
USW00054788	0.42879	4.21838	1.5707	0.477291	0.772165	16	Model accepted: missing values imputed	ridge
USW00054787	0.42879	3.04314	1.01409	0.373822	0.86024	17	Model accepted: missing values imputed	ridge
USW00054790	0.424262	3.12915	1.03079	0.351295	0.876576	17	Model accepted: missing values imputed	ridge
USW00014707	0.420997	2.64603	0.936572	0.332038	0.889737	14	Model accepted: missing values imputed	ridge
USC00301309	0.334018	6.21071	2.44826	0.599041	0.641093	6	Model accepted: missing values imputed	ridge
US1NYSF0123	0.0535987	4.63967	1.80799	0.539385	0.708778	3	Model accepted: missing values imputed	ridge
Table S1. Imputation statistics for all precipitation stations considered in the analysis. Proportion_complete shows the original, raw record data availability as a proportion of daily record length (1970 to 2021). Root mean squared error (RMSE), mean absolute error (MAE), normalized root mean squared error (NRMSE), and nash sutcliffe efficiency (NSE) are measures of model performance between pre…

## Sheet: S2_coastal imp stats
site_no	proportion_complete	RMSE	MAE	NRMSE	NSE	n_refs	mod_notes	regression_model
8467150	0.988048	0.0185859	0.0121871	0.786776	0.986662	30	Model accepted: missing values imputed	ridge
8510560	0.867129	0.025912	0.0194326	1.44239	0.968498	30	Model accepted: missing values imputed	ridge
8461490	0.832669	0.0193894	0.0144968	1.03301	0.981174	30	Model accepted: missing values imputed	ridge
8516990	0.552698	0.0258396	0.0167057	1.06491	0.97782	30	Model accepted: missing values imputed	ridge
8516945	0.454804	0.0248628	0.0164696	0.921863	0.979762	30	Model accepted: missing values imputed	ridge
8465705	0.435608	0.0183068	0.0124077	0.809032	0.984727	29	Model accepted: missing values imputed	ridge
8514560	0.406323	0.0269116	0.0172314	1.4534	0.969656	30	Model accepted: missing values imputed	ridge
8518750	0.349615	0.0211646	0.0154487	0.794524	0.983285	29	Model accepted: missing values imputed	ridge
1311875	0.281161	0.0561695	0.0434413	0.687533	0.988423	28	Model accepted: missing values imputed	ridge
1310740	0.280902	0.0654119	0.048261	0.868606	0.983543	28	Model accepted: missing values imputed	ridge
1311850	0.280747	0.0909767	0.0491356	1.19799	0.96762	28	Model accepted: missing values imputed	ridge
1194796	0.280747	0.0586517	0.0386842	0.958595	0.983799	29	Model accepted: missing values imputed	ridge
1310521	0.280644	0.0555624	0.0383014	0.74061	0.987806	28	Model accepted: missing values imputed	ridge
1311145	0.279764	0.054734	0.0344623	0.674078	0.988675	14	Model accepted: missing values imputed	ridge
1309225	0.277746	0.101976	0.0743233	1.56359	0.956504	28	Model accepted: missing values imputed	ridge
1302845	0.276194	NA	NA	NA	NA	NA	Model rejected: does not meet criteria specified by error threshold	NA
1302250	0.251772	0.204909	0.15652	4.46213	0.718097	1	Model accepted: missing values imputed	SLR
1194750	0.235474	0.164234	0.108556	2.59945	0.902613	13	Model accepted: missing values imputed	ridge
1302600	0.230351	NA	NA	NA	NA	NA	No reference wells with sufficient data after distance and/or correlation cutoffs applied	NA
1311143	0.217002	0.234372	0.103779	2.93387	0.843459	27	Model accepted: missing values imputed	ridge
1304562	0.185957	0.176572	0.106587	2.73628	0.907797	27	Model accepted: missing values imputed	ridge
1304057	0.180783	0.131104	0.0917786	2.14601	0.903091	28	Model accepted: missing values imputed	ridge
1304200	0.172039	0.0918104	0.058593	1.27999	0.965671	29	Model accepted: missing values imputed	ridge
1194815	0.131371	0.0827568	0.0585793	1.73911	0.968387	29	Model accepted: missing values imputed	ridge
1209510	0.125886	0.10662	0.0651099	2.08343	0.955127	28	Model accepted: missing values imputed	ridge
1211229	0.110674	0.0962077	0.0591359	1.77199	0.968489	28	Model accepted: missing values imputed	ridge
1305575	0.108863	0.0948432	0.0673048	2.30085	0.95437	11	Model accepted: missing values imputed	ridge
8518490	0.102706	NA	NA	NA	NA	NA	No reference wells with sufficient data after distance and/or correlation cutoffs applied	NA
1304746	0.102189	0.0577562	0.0340092	1.30854	0.984636	29	Model accepted: missing values imputed	ridge
1306402	0.101568	0.0569348	0.041542	1.41062	0.983155	21	Model accepted: missing values imputed	ridge
8512735	0.0917887	0.0320364	0.0228753	1.89339	0.966011	30	Model accepted: missing values imputed	ridge
8510719	0.0840793	0.0131169	0.00959494	1.00715	0.989951	30	Model accepted: missing values imputed	ridge
8515786	0.07994	NA	NA	NA	NA	NA	No reference wells with sufficient data after distance and/or correlation cutoffs applied	NA
1304920	0.055156	0.0803741	0.0510428	2.03093	0.968939	29	Model accepted: missing values imputed	ridge
Table S2. Imputation statistics for all coastal station NTR values considered in the analysis. Proportion_complete shows the original, raw record data availability as a proportion of daily record length (1970 to 2021). Root mean squared error (RMSE), mean absolute error (MAE), normalized root mean squared error (NRMSE), and nash sutcliffe efficiency (NSE) are measures of model performance between…

## Sheet: S3_GW imp stats
Table S3. Imputation statistics for all monthly groundwater observation stations considered in the analysis. Proportion_complete shows the original, raw record data availability as a proportion of daily record length (1970 to 2021). Root mean squared error (RMSE), mean absolute error (MAE), normalized root mean squared error (NRMSE), and nash sutcliffe efficiency (NSE) are measures of model perfo…
site_no	proportion_complete	RMSE	MAE	NRMSE	NSE	n_refs	mod_notes	regression_model
X.413033072432001	0.986532	1.17419	0.871327	8.46266	0.834305	10	Model accepted: missing values imputed	ridge
X.413907071465001	0.983165	0.448649	0.332984	7.07648	0.785028	10	Model accepted: missing values imputed	ridge
X.413245072584201	0.976431	1.34234	0.858976	7.12494	0.806669	10	Model accepted: missing values imputed	ridge
X.413202073122401	0.974747	1.00346	0.787085	8.28625	0.884273	10	Model accepted: missing values imputed	ridge
X.414054071552001	0.973064	0.40221	0.303585	6.97071	0.847134	10	Model accepted: missing values imputed	ridge
X.413007073250501	0.973064	0.471933	0.359956	6.66572	0.896444	10	Model accepted: missing values imputed	ridge
X.411256073153101	0.968013	NA	NA	NA	NA	NA	No reference wells with sufficient data after distance and/or correlation cutoffs applied	NA
X.412013072030601	0.96633	0.477531	0.366217	7.49657	0.838596	10	Model accepted: missing values imputed	ridge
X.413134073021701	0.957912	NA	NA	NA	NA	NA	No reference wells with sufficient data after distance and/or correlation cutoffs applied	NA
X.412307072515201	0.956229	0.448459	0.341167	6.64876	0.831114	10	Model accepted: missing values imputed	ridge
X.412429073165101	0.934343	0.861776	0.657037	7.7013	0.874972	10	Model accepted: missing values imputed	ridge
X.404301073240904	0.919192	1.59229	0.826826	5.67358	0.594778	6	Model accepted: missing values imputed	ridge
X.413254072335501	0.89899	0.8174	0.616539	7.93593	0.850312	10	Model accepted: missing values imputed	ridge
X.412824072173301	0.897306	0.596763	0.424043	6.32835	0.924185	10	Model accepted: missing values imputed	ridge
X.404317073291105	0.885522	1.43009	1.09695	8.26165	0.805024	10	Model accepted: missing values imputed	ridge
X.404812073004101	0.863636	0.286507	0.227132	4.1224	0.944587	10	Model accepted: missing values imputed	ridge
X.405027073272602	0.853535	0.884081	0.648989	9.17097	0.821436	10	Model accepted: missing values imputed	ridge
X.405343073055004	0.846801	0.587672	0.460911	5.29195	0.939874	10	Model accepted: missing values imputed	ridge
X.412154071462901	0.841751	0.405303	0.307615	7.03652	0.852606	10	Model accepted: missing values imputed	ridge
X.405309072233101	0.792929	0.233194	0.170802	4.55902	0.90739	10	Model accepted: missing values imputed	ridge
X.412844071422802	0.789562	0.398284	0.2717	7.22838	0.81326	10	Model accepted: missing values imputed	ridge
X.404757073440401	0.787879	NA	NA	NA	NA	NA	No reference wells with sufficient data after distance and/or correlation cutoffs applied	NA
X.412809072420701	0.76431	0.940255	0.670945	6.74502	0.907025	10	Model accepted: missing values imputed	ridge
X.404442073240503	0.755892	0.581257	0.475845	3.80653	0.955843	10	Model accepted: missing values imputed	ridge
X.413457072252201	0.750842	0.38721	0.276924	7.62975	0.806587	10	Model accepted: missing values imputed	ridge
X.404642072520001	0.737374	0.490313	0.370926	6.69826	0.87096	10	Model accepted: missing values imputed	ridge
X.403929073382908	0.737374	0.414883	0.327544	6.07442	0.902264	10	Model accepted: missing values imputed	ridge
X.410858072171501	0.734007	0.404278	0.291099	7.25814	0.782215	10	Model accepted: missing values imputed	ridge
X.405743072425701	0.723906	0.480424	0.38149	7.7991	0.801961	10	Model accepted: missing values imputed	ridge
X.412825072410501	0.713805	0.729189	0.538944	7.4483	0.78193	10	Model accepted: missing values imputed	ridge
X.405037072390301	0.710438	0.50877	0.417554	6.56478	0.918341	10	Model accepted: missing values imputed	ridge
X.413358071433801	0.708754	0.410771	0.311576	5.61163	0.907832	10	Model accepted: missing values imputed	ridge
X.410316071535501	0.705387	0.153154	0.102392	5.58958	0.870286	2	Model accepted: missing values imputed	ridge
X.413535072253701	0.70202	0.718664	0.509206	5.73097	0.933812	10	Model accepted: missing values imputed	ridge
X.410149071583201	0.700337	NA	NA	NA	NA	NA	No reference wells with sufficient data after distance and/or correlation cutoffs applied	NA
X.404213073201004	0.686869	0.189662	0.134484	2.78505	0.953222	10	Model accepted: missing values imputed	ridge
X.405927072041901	0.685185	NA	NA	NA	NA	NA	No reference wells with sufficient data after distance and/or correlation cutoffs applied	NA
X.405149072532201	0.680135	0.87532	0.713406	6.87604	0.864702	10	Model accepted: missing values imputed	ridge
X.405034073140401	0.673401	NA	NA	NA	NA	NA	No reference wells with sufficient data after distance and/or correlation cutoffs applied	NA
X.404609073421602	0.671717	NA	NA	NA	NA	NA	No reference wells with sufficient data after distance and/or correlation cutoffs applied	NA
X.405322072454101	0.664983	0.508731	0.39377	4.25717	0.951883	10	Model accepted: missing values imputed	ridge
X.413126071455501	0.661616	0.965341	0.638644	6.16044	0.907187	10	Model accepted: missing values imputed	ridge
X.404614073164404	0.653199	0.50656	0.374163	4.35938	0.953457	10	Model accepted: missing values imputed	ridge
X.410634072223601	0.651515	0.18986	0.137551	4.92503	0.879808	7	Model accepted: missing values imputed	ridge
X.405230073212101	0.651515	NA	NA	NA	NA	NA	No reference wells with sufficient data after distance and/or correlation cutoffs applied	NA
X.413002073131001	0.644781	0.53577	0.422947	9.28544	0.660081	5	Model accepted: missing values imputed	ridge
X.412935073122701	0.644781	0.907368	0.708884	7.80867	0.882544	10	Model accepted: missing values imputed	ridge
X.412954073125201	0.643098	0.448758	0.345908	5.63766	0.928821	10	Model accepted: missing values imputed	ridge
X.412746071510601	0.643098	NA	NA	NA	NA	NA	No reference wells with sufficient data after distance and/or correlation cutoffs applied	NA
X.411735072315001	0.643098	0.511477	0.335346	7.41271	0.733378	10	Model accepted: missing values imputed	ridge
X.412931071514201	0.641414	0.923	0.683807	6.87267	0.883625	10	Model accepted: missing values imputed	ridge
X.404221073164905	0.632997	0.229092	0.162456	6.71823	0.813298	5	Model accepted: missing values imputed	ridge
X.403911073432001	0.631313	NA	NA	NA	NA	NA	No reference wells with sufficient data after distance and/or correlation cutoffs applied	NA
X.410400072195301	0.616162	0.363569	0.279774	4.94652	0.913533	10	Model accepted: missing values imputed	ridge
X.411826072322401	0.614478	0.527093	0.405828	7.45534	0.843407	10	Model accepted: missing values imputed	ridge
X.413518072264501	0.609428	0.670042	0.505072	6.60791	0.909828	10	Model accepted: missing values imputed	ridge
X.413554072270201	0.604377	0.947692	0.715292	6.72361	0.933628	10	Model accepted: missing values imputed	ridge
X.411832072325501	0.60101	0.724672	0.513315	6.41871	0.921324	10	Model accepted: missing values imputed	ridge
X.411058073182001	0.599327	0.392964	0.25905	6.97983	0.761562	10	Model accepted: missing values imputed	ridge
X.404835073404004	0.597643	1.12968	0.856031	11.9164	0.692088	5	Model accepted: missing values imputed	ridge
X.403517073430705	0.597643	NA	NA	NA	NA	NA	No reference wells with sufficient data after distance and/or correlation cutoffs applied	NA
X.405000073293301	0.594276	0.670206	0.502944	5.30226	0.938757	10	Model accepted: missing values imputed	ridge
X.411118073175801	0.592593	0.906731	0.695824	6.93219	0.87581	10	Model accepted: missing values imputed	ridge
X.411124073172201	0.589226	1.07767	0.751251	7.54142	0.889398	10	Model accepted: missing values imputed	ridge
X.412546072541701	0.585859	0.197525	0.124729	3.84291	0.929613	10	Model accepted: missing values imputed	ridge
X.412423072542801	0.585859	2.13992	1.61891	8.37543	0.823221	10	Model accepted: missing values imputed	ridge
X.404958073085001	0.585859	0.570178	0.444662	4.86915	0.943082	10	Model accepted: missing values imputed	ridge
X.412546072541702	0.584175	0.233361	0.157859	5.12882	0.858199	10	Model accepted: missing values imputed	ridge
X.412541072542001	0.584175	0.328586	0.192591	5.90982	0.829672	10	Model accepted: missing values imputed	ridge
X.412417072541901	0.584175	1.31468	0.934239	6.75581	0.769502	10	Model accepted: missing values imputed	ridge
X.404859073194004	0.584175	0.934571	0.732665	9.16246	0.817468	10	Model accepted: missing values imputed	ridge
X.405529073272901	0.582492	0.305487	0.2551	5.54423	0.907533	10	Model accepted: missing values imputed	ridge
X.405001073343205	0.575758	0.59857	0.475125	5.27375	0.9362	10	Model accepted: missing values imputed	ridge
X.411103073181301	0.56734	0.836225	0.639485	8.39583	0.87857	10	Model accepted: missing values imputed	ridge
X.405146073031801	0.548822	0.601916	0.461895	6.12325	0.918984	10	Model accepted: missing values imputed	ridge
X.412916073121701	0.543771	1.0066	0.747068	6.98059	0.904765	10	Model accepted: missing values imputed	ridge
X.404451073475002	0.543771	0.678945	0.532404	5.59724	0.957882	4	Model accepted: missing values imputed	ridge
X.404125073394802	0.52862	0.526987	0.408197	6.01927	0.927569	10	Model accepted: missing values imputed	ridge
X.404210073340801	0.526936	0.464058	0.360741	4.3048	0.942031	10	Model accepted: missing values imputed	ridge
X.412417072541902	0.523569	0.822486	0.634098	8.51435	0.598273	2	Model accepted: missing values imputed	ridge
X.414128073475201	0.516835	1.29859	1.00119	15.3226	0.648919	10	Model accepted: missing values imputed	ridge
X.404446073392904	0.516835	1.15544	0.813698	9.51374	0.768725	10	Model accepted: missing values imputed	ridge
X.411802073593001	0.484848	2.39663	1.7678	8.99131	0.759217	10	Model accepted: missing values imputed	ridge
X.415843072213401	0.479798	0.452316	0.353752	5.2779	0.937686	10	Model accepted: missing values imputed	ridge
X.412824072411901	0.474747	NA	NA	NA	NA	NA	No reference wells with sufficient data after distance and/or correlation cutoffs applied	NA
X.412824072411902	0.473064	NA	NA	NA	NA	NA	Model rejected: does not meet criteria specified by error threshold	NA
X.404433073212701	0.47138	0.398044	0.304157	7.09526	0.885698	10	Model accepted: missing values imputed	ridge
X.403702073555808	0.462963	NA	NA	NA	NA	NA	No reference wells with sufficient data after distance and/or correlation cutoffs applied	NA
X.403635073580108	0.451178	NA	NA	NA	NA	NA	No reference wells with sufficient data after distance and/or correlation cutoffs applied	NA
X.403737073564908	0.446128	NA	NA	NA	NA	NA	No reference wells with sufficient data after distance and/or correlation cutoffs applied	NA
X.413505071452801	0.442761	1.30462	1.0032	8.72654	0.907792	10	Model accepted: missing values imputed	ridge
X.404740073285701	0.439394	0.735953	0.554402	3.96419	0.961907	10	Model accepted: missing values imputed	ridge
X.410309072205601	0.43266	NA	NA	NA	NA	NA	No reference wells with sufficient data after distance and/or correlation cutoffs applied	NA
X.410439072173501	0.429293	NA	NA	NA	NA	NA	No reference wells with sufficient data after distance and/or correlation cutoffs applied	NA
X.405808072385401	0.425926	0.701386	0.45414	9.60803	0.627615	6	Model accepted: missing values imputed	ridge
X.405650072542002	0.425926	0.481243	0.385786	5.84033	0.9212	10	Model accepted: missing values imputed	ridge
X.405517072574902	0.425926	0.42642	0.335163	4.47215	0.959182	10	Model accepted: missing values imputed	ridge
X.404213073201005	0.425926	0.174323	0.117614	3.16951	0.958266	10	Model accepted: missing values imputed	ridge
X.405620073022001	0.420875	0.585511	0.440414	6.44127	0.904655	10	Model accepted: missing values imputed	ridge
X.404930072483502	0.415825	0.682	0.531701	7.51102	0.827163	10	Model accepted: missing values imputed	ridge
X.403751073440202	0.407407	NA	NA	NA	NA	NA	No reference wells with sufficient data after distance and/or correlation cutoffs applied	NA
X.412434071422401	0.402357	NA	NA	NA	NA	NA	No reference wells with sufficient data after distance and/or correlation cutoffs applied	NA
X.405010073103101	0.400673	NA	NA	NA	NA	NA	No reference wells with sufficient data after distance and/or correlation cutoffs applied	NA
X.404236073574601	0.395623	NA	NA	NA	NA	NA	No reference wells with sufficient data after distance and/or correlation cutoffs applied	NA
X.412424071423601	0.393939	1.3895	0.986627	13.5561	0.717845	10	Model accepted: missing values imputed	ridge
X.404319073184605	0.390572	0.184884	0.140626	6.67452	0.882192	10	Model accepted: missing values imputed	ridge
X.405309073125401	0.388889	0.843964	0.456647	6.05861	0.738014	10	Model accepted: missing values imputed	ridge
X.404901073443004	0.388889	NA	NA	NA	NA	NA	No reference wells with sufficient data after distance and/or correlation cutoffs applied	NA
X.405055073430701	0.382155	0.788955	0.588291	9.51695	0.728982	10	Model accepted: missing values imputed	ridge
X.405906072153501	0.380471	0.306244	0.233207	5.07027	0.94013	10	Model accepted: missing values imputed	ridge
X.404607072594702	0.380471	0.216205	0.156052	9.40023	0.70355	7	Model accepted: missing values imputed	ridge
X.404813073101101	0.377104	0.701849	0.46961	6.34583	0.924013	10	Model accepted: missing values imputed	ridge
X.405231073250500	0.373737	0.250569	0.195124	9.9039	0.759923	10	Model accepted: missing values imputed	ridge
X.412450073413101	0.372054	1.05978	0.824054	7.06519	0.892754	10	Model accepted: missing values imputed	ridge
X.405230073164400	0.367003	0.726629	0.558882	6.14745	0.932071	10	Model accepted: missing values imputed	ridge
X.405827072190501	0.36532	0.785995	0.637679	7.50712	0.900072	10	Model accepted: missing values imputed	ridge
X.404039073420001	0.363636	0.903337	0.738754	8.10531	0.889034	5	Model accepted: missing values imputed	ridge
X.410243071560101	0.361953	0.209579	0.143315	8.31663	0.737759	1	Model accepted: missing values imputed	SLR
X.410040072002501	0.361953	NA	NA	NA	NA	NA	No reference wells with sufficient data after distance and/or correlation cutoffs applied	NA
X.405906072110102	0.361953	0.324259	0.240537	5.6788	0.928545	10	Model accepted: missing values imputed	ridge
X.404947073450201	0.360269	NA	NA	NA	NA	NA	No reference wells with sufficient data after distance and/or correlation cutoffs applied	NA
X.404925073405402	0.353535	0.518387	0.378383	6.76746	0.870462	10	Model accepted: missing values imputed	ridge
X.404530073115104	0.353535	0.394058	0.291235	6.32516	0.905741	10	Model accepted: missing values imputed	ridge
X.404019073384601	0.351852	0.304955	0.195868	5.3879	0.87448	7	Model accepted: missing values imputed	ridge
X.404119073380201	0.350168	0.263901	0.211698	4.90522	0.902565	10	Model accepted: missing values imputed	ridge
X.404040073420102	0.350168	0.479432	0.385912	8.05092	0.742538	9	Model accepted: missing values imputed	ridge
X.405048073122801	0.348485	0.282937	0.215606	8.24888	0.729695	10	Model accepted: missing values imputed	ridge
X.404037073584001	0.348485	0.515865	0.412969	7.1648	0.877548	10	Model accepted: missing values imputed	ridge
X.410132072184601	0.345118	0.283577	0.202931	7.69543	0.718688	1	Model accepted: missing values imputed	SLR
X.404659073202001	0.340067	NA	NA	NA	NA	NA	No reference wells with sufficient data after distance and/or correlation cutoffs applied	NA
X.404751073240903	0.3367	0.657533	0.519713	5.05406	0.956931	10	Model accepted: missing values imputed	ridge
X.403940073443501	0.33165	NA	NA	NA	NA	NA	No reference wells with sufficient data after distance and/or correlation cutoffs applied	NA
X.404656073081401	0.324916	0.438424	0.332376	6.28114	0.912083	10	Model accepted: missing values imputed	ridge
X.404039073555001	0.321549	0.174919	0.130648	5.92944	0.91546	10	Model accepted: missing values imputed	ridge
X.405212073354002	0.319865	0.983235	0.738321	8.88198	0.780413	10	Model accepted: missing values imputed	ridge
X.403520073575501	0.316498	NA	NA	NA	NA	NA	No reference wells with sufficient data after distance and/or correlation cutoffs applied	NA
X.404402073520901	0.314815	NA	NA	NA	NA	NA	No reference wells with sufficient data after distance and/or correlation cutoffs applied	NA
X.404345073124001	0.314815	NA	NA	NA	NA	NA	No reference wells with sufficient data after distance and/or correlation cutoffs applied	NA
X.404454073393001	0.313131	0.706954	0.538158	4.45185	0.957845	10	Model accepted: missing values imputed	ridge
X.404050073384001	0.306397	0.389883	0.299067	4.92899	0.913037	7	Model accepted: missing values imputed	ridge
X.404124073394901	0.30303	0.412387	0.33303	5.12919	0.853712	10	Model accepted: missing values imputed	ridge
X.405908072110001	0.301347	0.399851	0.302749	6.49108	0.885625	10	Model accepted: missing values imputed	ridge
X.404355073105401	0.299663	0.440898	0.292715	7.49826	0.796247	6	Model accepted: missing values imputed	ridge
X.403942073334401	0.294613	0.091428	0.0689067	2.37475	0.975144	7	Model accepted: missing values imputed	ridge
X.405038072431101	0.292929	0.322253	0.240503	4.25697	0.951463	10	Model accepted: missing values imputed	ridge
X.405036073412402	0.292929	0.732632	0.585931	7.8693	0.840173	10	Model accepted: missing values imputed	ridge
X.405829072084302	0.289562	0.258445	0.183701	5.27438	0.93303	10	Model accepted: missing values imputed	ridge
X.405308072553102	0.289562	0.465001	0.351766	4.72562	0.951198	10	Model accepted: missing values imputed	ridge
X.404059073520702	0.287879	NA	NA	NA	NA	NA	No reference wells with sufficient data after distance and/or correlation cutoffs applied	NA
X.403939073472802	0.287879	NA	NA	NA	NA	NA	No reference wells with sufficient data after distance and/or correlation cutoffs applied	NA
X.403612073573208	0.287879	NA	NA	NA	NA	NA	No reference wells with sufficient data after distance and/or correlation cutoffs applied	NA
X.410343071533101	0.286195	0.22373	0.137625	9.4401	0.563319	1	Model accepted: missing values imputed	SLR
X.405741072144800	0.284512	0.356098	0.263888	4.69167	0.932497	10	Model accepted: missing values imputed	ridge
X.405507072244403	0.284512	0.231934	0.171003	6.49674	0.861946	10	Model accepted: missing values imputed	ridge
X.404241073443301	0.284512	1.62508	1.20448	8.06491	0.913199	10	Model accepted: missing values imputed	ridge
X.404135073584001	0.284512	0.189173	0.147674	7.84951	0.749113	10	Model accepted: missing values imputed	ridge
X.404949073215101	0.281145	0.707487	0.503326	4.82268	0.937507	10	Model accepted: missing values imputed	ridge
X.403840073592101	0.276094	0.331917	0.26821	12.2932	0.676084	4	Model accepted: missing values imputed	ridge
X.404547073524401	0.274411	NA	NA	NA	NA	NA	No reference wells with sufficient data after distance and/or correlation cutoffs applied	NA
X.405256072392301	0.271044	0.314461	0.244732	4.33142	0.969715	10	Model accepted: missing values imputed	ridge
X.405019073415301	0.267677	NA	NA	NA	NA	NA	No reference wells with sufficient data after distance and/or correlation cutoffs applied	NA
X.404459073422401	0.267677	0.546817	0.450246	4.47477	0.977337	10	Model accepted: missing values imputed	ridge
X.404504073444401	0.262626	0.30905	0.214225	5.96621	0.969072	10	Model accepted: missing values imputed	ridge
X.404654073465901	0.260943	0.397815	0.303594	9.99535	0.783163	10	Model accepted: missing values imputed	ridge
X.403827073535202	0.259259	0.0994227	0.0754516	4.56068	0.92013	10	Model accepted: missing values imputed	ridge
X.410320071570601	0.255892	NA	NA	NA	NA	NA	No reference wells with sufficient data after distance and/or correlation cutoffs applied	NA
X.410247072261101	0.254209	NA	NA	NA	NA	NA	No reference wells with sufficient data after distance and/or correlation cutoffs applied	NA
X.405311073331801	0.254209	0.435841	0.310445	6.60365	0.875163	10	Model accepted: missing values imputed	ridge
X.405013073263602	0.254209	0.840359	0.367851	5.339	0.894294	10	Model accepted: missing values imputed	ridge
X.403949073532109	0.250842	NA	NA	NA	NA	NA	No reference wells with sufficient data after distance and/or correlation cutoffs applied	NA
X.405607072393502	0.249158	0.381152	0.239756	5.92772	0.778214	10	Model accepted: missing values imputed	ridge
X.404017073544502	0.249158	0.115269	0.082702	4.52034	0.94079	10	Model accepted: missing values imputed	ridge
X.404539073465301	0.247475	0.199223	0.141043	3.78032	0.982645	10	Model accepted: missing values imputed	ridge
X.405019073415303	0.245791	0.189828	0.123699	4.71038	0.924299	10	Model accepted: missing values imputed	ridge
X.404232073524401	0.245791	0.295672	0.226301	4.92787	0.966636	10	Model accepted: missing values imputed	ridge
X.403902073552802	0.245791	0.126836	0.0982503	5.76525	0.934477	10	Model accepted: missing values imputed	ridge
X.405019073415302	0.244108	0.323348	0.196531	6.86514	0.846323	10	Model accepted: missing values imputed	ridge
X.404516073550201	0.240741	NA	NA	NA	NA	NA	No reference wells with sufficient data after distance and/or correlation cutoffs applied	NA
X.404337073540301	0.240741	0.0931173	0.0723725	8.54287	0.814828	10	Model accepted: missing values imputed	ridge
X.405830072331502	0.239057	0.267121	0.208836	4.8656	0.920542	10	Model accepted: missing values imputed	ridge
X.404653073485301	0.239057	0.279399	0.227871	4.27215	0.96774	10	Model accepted: missing values imputed	ridge
X.404155073552108	0.237374	0.439564	0.331822	8.30934	0.866703	7	Model accepted: missing values imputed	ridge
X.403805073395304	0.237374	NA	NA	NA	NA	NA	No reference wells with sufficient data after distance and/or correlation cutoffs applied	NA
X.404846072533202	0.23569	0.142661	0.0931908	8.24632	0.822836	10	Model accepted: missing values imputed	ridge
X.404617073483201	0.234007	0.249324	0.188865	4.66899	0.968726	10	Model accepted: missing values imputed	ridge
X.404508073080902	0.232323	0.185543	0.126707	7.02813	0.770362	8	Model accepted: missing values imputed	ridge
X.404407073551501	0.23064	0.327317	0.27416	6.9642	0.933819	10	Model accepted: missing values imputed	ridge
X.403959073474401	0.227273	1.51174	1.17962	14.3293	0.706249	3	Model accepted: missing values imputed	ridge
X.404119073463601	0.222222	0.514073	0.377937	8.71311	0.63541	1	Model accepted: missing values imputed	SLR
X.410356072260301	0.220539	NA	NA	NA	NA	NA	No reference wells with sufficient data after distance and/or correlation cutoffs applied	NA
X.405558072251401	0.220539	NA	NA	NA	NA	NA	No reference wells with sufficient data after distance and/or correlation cutoffs applied	NA
X.404509073485301	0.220539	0.13592	0.10497	4.65479	0.969608	10	Model accepted: missing values imputed	ridge
X.410218072093301	0.217172	NA	NA	NA	NA	NA	No reference wells with sufficient data after distance and/or correlation cutoffs applied	NA
X.404025073515101	0.217172	0.250653	0.166354	11.4979	0.716847	4	Model accepted: missing values imputed	ridge
X.405740073064501	0.213805	NA	NA	NA	NA	NA	No reference wells with sufficient data after distance and/or correlation cutoffs applied	NA
X.404206073564601	0.213805	NA	NA	NA	NA	NA	No reference wells with sufficient data after distance and/or correlation cutoffs applied	NA
X.404730073423101	0.212121	NA	NA	NA	NA	NA	No reference wells with sufficient data after distance and/or correlation cutoffs applied	NA
X.404510073560402	0.212121	0.414609	0.297084	13.3315	0.666184	10	Model accepted: missing values imputed	ridge
X.405301072415101	0.208754	0.434113	0.3102	4.80745	0.956878	10	Model accepted: missing values imputed	ridge
X.404613073545802	0.208754	0.159748	0.126208	6.769	0.85854	10	Model accepted: missing values imputed	ridge
X.405220072493101	0.207071	0.530521	0.430017	7.67758	0.833082	10	Model accepted: missing values imputed	ridge
X.404155073552109	0.207071	0.247287	0.182716	6.94626	0.905095	10	Model accepted: missing values imputed	ridge
X.404027073464501	0.205387	0.344313	0.260687	8.62939	0.740058	10	Model accepted: missing values imputed	ridge
X.403940073443601	0.205387	NA	NA	NA	NA	NA	No reference wells with sufficient data after distance and/or correlation cutoffs applied	NA
X.403939073542902	0.203704	0.102227	0.0815498	5.61689	0.929303	10	Model accepted: missing values imputed	ridge
X.405131072455701	0.20202	0.433098	0.341893	4.51614	0.956311	10	Model accepted: missing values imputed	ridge
X.410241072212302	0.200337	NA	NA	NA	NA	NA	No reference wells with sufficient data after distance and/or correlation cutoffs applied	NA

## Sheet: S4_well IDs
Table S4. List of wells considered for each triad cluster, including their 15 digit USGS well identification number (Well_ID), their respective station triad (Triad), their latitude (Lat) and longitude (Long) in geographic coordinates, and their minimum depth to water in feet below land surface (Min_depth_ft).
Well_ID	Triad	Lat	Lon	Min_depth_ft
X.403827073535202	1	40.6409	-73.8974	11.96
X.403959073474401	1	40.6665	-73.7951	19.39
X.404025073515101	1	40.6737	-73.8637	15.76
X.403959073474401	2	40.6665	-73.7951	19.39
X.404027073464501	2	40.6743	-73.7787	11.53
X.404509073485301	3	40.7527	-73.8145	29.81
X.404653073485301	3	40.7827	-73.8142	21
X.404654073465901	3	40.7821	-73.7818	15.95
X.404337073540301	4	40.727	-73.9005	9.47
X.404613073545802	4	40.7703	-73.9156	22.04
X.403929073382908	5	40.6585	-73.641	11.76
X.404019073384601	5	40.6721	-73.6461	16.15
X.404019073384601	6	40.6721	-73.6461	16.15
X.404039073420001	6	40.6779	-73.6999	13.63
X.404040073420102	6	40.6778	-73.6998	11.115
X.404027073464501	7	40.6743	-73.7787	11.53
X.404039073420001	7	40.6779	-73.6999	13.63
X.404040073420102	7	40.6778	-73.6998	11.115
X.404119073463601	7	40.6887	-73.7762	11.67
X.403942073334401	8	40.6618	-73.5618	6.38
X.404317073291105	8	40.7212	-73.4857	20.9
X.403942073334401	9	40.6618	-73.5618	6.38
X.404210073340801	9	40.7031	-73.5686	16.05
X.403929073382908	10	40.6585	-73.641	11.76
X.403942073334401	10	40.6618	-73.5618	6.38
X.404019073384601	10	40.6721	-73.6461	16.15
X.404050073384001	10	40.6805	-73.6442	19.13
X.404119073380201	10	40.6888	-73.6335	19.29
X.404210073340801	10	40.7031	-73.5686	16.05
X.405019073415302	11	40.8386	-73.6976	0.5
X.405019073415303	11	40.8387	-73.6976	0.27
X.405036073412402	11	40.8436	-73.6896	16.31
X.405055073430701	11	40.8464	-73.7201	45.99
X.405001073343205	12	40.8503	-73.5757	18.78
X.405027073272602	12	40.8408	-73.4556	3.3
X.405212073354002	12	40.8705	-73.5943	28.2
X.412013072030601	13	41.3368	-72.0513	10.86
X.412824072173301	13	41.4736	-72.2916	4.75
X.412013072030601	14	41.3368	-72.0513	10.86
X.412931071514201	14	41.4921	-71.8599	4.78
X.403827073535202	15	40.6409	-73.8974	11.96
X.403902073552802	15	40.6506	-73.924	16.4
X.403939073542902	15	40.6608	-73.9076	14.61
X.404017073544502	15	40.6715	-73.9121	37.28
X.404025073515101	15	40.6737	-73.8637	15.76
X.404039073555001	15	40.6775	-73.9301	49.16
X.404155073552108	15	40.6987	-73.9221	12.98
X.404155073552109	15	40.6987	-73.9221	16.04
X.404213073201004	16	40.7041	-73.3443	3.93
X.404213073201005	16	40.7041	-73.3443	4.1
X.404301073240904	16	40.7172	-73.402	0
X.404442073240503	16	40.745	-73.4009	23.33
X.404355073105401	17	40.732	-73.1818	0
X.404530073115104	17	40.7641	-73.1971	3.54
X.404508073080902	18	40.7523	-73.1357	3.4
X.404656073081401	18	40.7827	-73.137	35.33
X.404508073080902	19	40.7523	-73.1357	3.4
X.404607072594702	19	40.7683	-72.996	14.73
X.404656073081401	19	40.7827	-73.137	35.33
X.405829072084302	20	40.9748	-72.1448	25.35
X.405906072110102	20	40.9851	-72.1831	18.64
X.405908072110001	20	40.9857	-72.1829	18.44
X.405048073122801	21	40.8464	-73.2077	0.12
X.405309073125401	21	40.8871	-73.2155	35.59
X.405220072493101	22	40.8723	-72.8249	9.73
X.405308072553102	22	40.8858	-72.9247	39.74
X.411058073182001	23	41.1825	-73.3049	3.06
X.411103073181301	23	41.1837	-73.3033	1.74
X.411118073175801	23	41.1885	-73.299	1.93
X.411124073172201	23	41.1902	-73.289	0
X.412307072515201	24	41.3854	-72.8637	11.665
X.412417072541901	24	41.405	-72.9044	9.07
X.412417072541902	24	41.405	-72.9044	4.22

## Sheet: S5_COPcandidate models
Table S5. Candidate models for each triad for data conditioned on precipitation. Delta-AIC values (delta_AIC) represent the difference in Akaike Informaiton Criteria (AIC) between the given model and the model with the lowest AIC. Delta upper tail dependence coefficient (delta_uTDC) is the difference between the occurrences of bivariate exceedence above the95th percentile threshold of the data an…
triad	copula	delta_AIC	delta_uTDC
1	Gaussian	0	0.054
1	Survival Clayton	0.161	0.014
1	Frank	0.338	0.125
1	t	2.625	0.048
1	Gumbel	0.415	0.014
2	Gaussian	0	0.048
2	Survival Clayton	0.569	0.014
2	Frank	0.372	0.125
2	t	2.508	0.034
2	Gumbel	0.555	0
3	Gaussian	3.98	0.167
3	Survival Clayton	0	0.083
3	Frank	5.327	0.25
3	t	3.429	0.125
3	Gumbel	0.346	0.083
4	Gaussian	2.553	0.173
4	Survival Clayton	0	0.083
4	Frank	3.684	0.25
4	t	3.157	0.129
4	Gumbel	0.17	0.083
5	Gaussian	0	0.056
5	Survival Clayton	0.09	0.014
5	Frank	0.231	0.125
5	t	2.587	0.048
5	Gumbel	0.354	0.014
6	Gaussian	0	0.054
6	Survival Clayton	0.239	0.014
6	Frank	0.327	0.125
6	t	2.476	0.048
6	Gumbel	0.369	0
7	Gaussian	0	0.051
7	Survival Clayton	0.216	0.014
7	Frank	0.399	0.125
7	t	2.528	0.045
7	Gumbel	0.414	0
8	Gaussian	0	0.083
8	Survival Clayton	3.498	0.118
8	Frank	1.837	0.067
8	t	2.556	0.1
8	Gumbel	2.975	0.143
9	Gaussian	0	0.083
9	Survival Clayton	3.343	0.111
9	Frank	1.67	0.067
9	t	2.522	0.093
9	Gumbel	2.714	0.133
10	Gaussian	0	0.083
10	Survival Clayton	3.102	0.111
10	Frank	1.727	0.067
10	t	2.635	0.091
10	Gumbel	2.586	0.133
11	Gaussian	1.771	0.137
11	Survival Clayton	0.21	0.071
11	Frank	2.765	0.148
11	t	2.571	0.114
11	Gumbel	0	0.056
12	Gaussian	0.693	0.066
12	Survival Clayton	0	0
12	Frank	2.762	0.08
12	t	2.216	0.048
12	Gumbel	0.4	0.011
13	Gaussian	0.747	0.067
13	Survival Clayton	1.587	0.056
13	Frank	0	0.062
13	t	2.926	0.077
13	Gumbel	1.507	0.061
14	Gaussian	0.381	0.067
14	Survival Clayton	1.33	0.056
14	Frank	0	0.062
14	t	3.045	0.077
14	Gumbel	1.455	0.059
15	Gaussian	0	0.048
15	Survival Clayton	0.119	0.014
15	Frank	0.179	0.125
15	t	2.438	0.042
15	Gumbel	0.128	0
16	Gaussian	0	0.083
16	Survival Clayton	3.34	0.125
16	Frank	1.857	0.067
16	t	2.257	0.1
16	Gumbel	2.829	0.143
17	Gaussian	0.072	0
17	Survival Clayton	0.098	0
17	Frank	0	0
17	t	3.23	0
17	Gumbel	0.099	0
18	Gaussian	0.116	0.077
18	Survival Clayton	2.14	0.111
18	Frank	0	0.067
18	t	3.038	0.087
18	Gumbel	2.855	0.125
19	Gaussian	0.725	0
19	Survival Clayton	0	0
19	Frank	0.282	0
19	t	3.676	0.045
19	Gumbel	0.593	0
20	Gaussian	0.425	0
20	Survival Clayton	1.735	0.05
20	Frank	0	0
20	t	2.347	0.043
20	Gumbel	1.294	0.042
21	Gaussian	0.259	0.013
21	Survival Clayton	0	0
21	Frank	0.76	0.019
21	t	3.194	0.005
21	Gumbel	0.487	0
22	Gaussian	0.812	0.004
22	Survival Clayton	0	0.014
22	Frank	1.342	0.009
22	t	2.69	0.01
22	Gumbel	0.314	0.008
23	Gaussian	0	0.1
23	Survival Clayton	0.582	0
23	Frank	1.604	0
23	t	1.948	0.111
23	Gumbel	0.206	0.029
24	Gaussian	0.403	0
24	Survival Clayton	0	0.1
24	Frank	0.37	0
24	t	2.339	0.065
24	Gumbel	0.193	0.111

## Sheet: S6_COS candidate models
Table S6. Candidate models for each triad for data conditioned on surge. Delta-AIC values (delta_AIC) represent the difference in Akaike Informaiton Criteria (AIC) between the given model and the model with the lowest AIC. Delta upper tail dependence coefficient (delta_uTDC) is the difference between the occurrences of bivariate exceedence above the95th percentile threshold of the data and the me…
triad	copula	delta_AIC	delta_uTDC
1	Gaussian	2.445	0.017
1	Survival Clayton	0.784	0.067
1	Frank	1.528	0.046
1	t	0.296	0.025
1	Gumbel	0	0.082
2	Gaussian	0.367	0
2	Survival Clayton	0	0.067
2	Frank	0.917	0.035
2	t	1.956	0.011
2	Gumbel	0.194	0.082
3	Gaussian	2.59	0.109
3	Survival Clayton	0	0
3	Frank	4.017	0.138
3	t	3.359	0.075
3	Gumbel	0.056	0
4	Gaussian	0.607	0.19
4	Survival Clayton	0.367	0.085
4	Frank	4.815	0.236
4	t	2.521	0.179
4	Gumbel	0	0.085
5	Gaussian	1.508	0.02
5	Survival Clayton	0	0.056
5	Frank	1.751	0.111
5	t	3.094	0.011
5	Gumbel	0.431	0.071
6	Gaussian	2.23	0.077
6	Survival Clayton	0.124	0.013
6	Frank	2.761	0.087
6	t	1.851	0.029
6	Gumbel	0	0.028
7	Gaussian	2.007	0.147
7	Survival Clayton	0.194	0.064
7	Frank	3.679	0.164
7	t	2.966	0.128
7	Gumbel	0	0.056
8	Gaussian	0.383	0.028
8	Survival Clayton	0	0.049
8	Frank	0.213	0.111
8	t	2.522	0.02
8	Gumbel	0.003	0.056
9	Gaussian	0.375	0.083
9	Survival Clayton	0.156	0.154
9	Frank	0.266	0
9	t	2.256	0.095
9	Gumbel	0	0.167
10	Gaussian	0.886	0.029
10	Survival Clayton	0.13	0.043
10	Frank	1.129	0.1
10	t	2.718	0.017
10	Gumbel	0	0.054
11	Gaussian	0.838	0.123
11	Survival Clayton	0.085	0.057
11	Frank	0.775	0.2
11	t	3.034	0.109
11	Gumbel	0	0.046
12	Gaussian	0	0.106
12	Survival Clayton	6.292	0.031
12	Frank	2.064	0.147
12	t	3.112	0.097
12	Gumbel	4.998	0.009
13	Gaussian	0	0.111
13	Survival Clayton	2.87	0.2
13	Frank	1.318	0.077
13	t	2.225	0.122
13	Gumbel	1.714	0.222
14	Gaussian	0.401	0.091
14	Survival Clayton	1.962	0.167
14	Frank	0	0.071
14	t	2.245	0.103
14	Gumbel	0.737	0.19
15	Gaussian	0	0
15	Survival Clayton	1.891	0.067
15	Frank	1.45	0.033
15	t	0.189	0.033
15	Gumbel	0.135	0.1
16	Gaussian	0.326	0.063
16	Survival Clayton	2.205	0.093
16	Frank	0.801	0.082
16	t	1.508	0.036
16	Gumbel	0	0.082
17	Gaussian	0.278	0.071
17	Survival Clayton	4.378	0.043
17	Frank	0	0.082
17	t	1.769	0.054
17	Gumbel	2.707	0.004
18	Gaussian	2.607	0.021
18	Survival Clayton	5.016	0.102
18	Frank	0	0
18	t	0.54	0.077
18	Gumbel	3.546	0.123
19	Gaussian	2.539	0.023
19	Survival Clayton	3.547	0.014
19	Frank	0	0
19	t	1.934	0.077
19	Gumbel	1.242	0
20	Gaussian	0.255	0
20	Survival Clayton	1.852	0.034
20	Frank	0	0.009
20	t	1.996	0.009
20	Gumbel	1.488	0.054
21	Gaussian	0	0.043
21	Survival Clayton	2.423	0.046
21	Frank	0.323	0.077
21	t	2.333	0.029
21	Gumbel	2.102	0.068
22	Gaussian	3.78	0.034
22	Survival Clayton	7.665	0.123
22	Frank	0	0.006
22	t	4.641	0.058
22	Gumbel	6.027	0.145
23	Gaussian	1.314	0.109
23	Survival Clayton	1.225	0.033
23	Frank	0.995	0.129
23	t	2.466	0.089
23	Gumbel	0	0
24	Gaussian	1.576	0.003
24	Survival Clayton	0.7	0.077
24	Frank	0.31	0.005
24	t	1.536	0.048
24	Gumbel	0	0.09
